1 **Why panmictic bacteria are rare**

2 Chao Yang<sup>1#</sup>, Yujun Cui<sup>1#</sup>, Xavier Didelot<sup>2,3</sup>, Ruifu Yang<sup>1</sup>, Daniel Falush<sup>4\*</sup>

3

4 *1 State Key Laboratory of Pathogen and Biosecurity, Beijing Institute of Microbiology and*  
5 *Epidemiology, Beijing 100071, China*

6 *2 School of Life Sciences, University of Warwick, Gibbet Hill Campus, Coventry CV4 7AL, United*  
7 *Kingdom*

8 *3 Department of Statistics, University of Warwick, Coventry, CV4 7AL, United Kingdom*

9 *4 Milner Centre for Evolution, University of Bath, Bath, Somerset, United Kingdom*

10

11

12 <sup>#</sup>These authors contributed equally to the article

13 \* Corresponding authors: D. F. ([danielfalush@googlemail.com](mailto:danielfalush@googlemail.com))

14

15 **Abstract**

16 **Background** Bacteria typically have more structured populations than higher eukaryotes, but this  
17 difference is surprising given high recombination rates, enormous population sizes and effective  
18 geographical dispersal in many bacterial species.

19 **Results** We estimated the recombination scaled effective population size  $N_e r$  in 21 bacterial species  
20 and find that it does not correlate with synonymous nucleotide diversity as would be expected under  
21 neutral models of evolution. Only two species have estimates substantially over 100, consistent with  
22 approximate panmixia, namely *Helicobacter pylori* and *Vibrio parahaemolyticus*. Both species are far  
23 from demographic equilibrium, with diversity predicted to increase more than 30 fold in *V.*  
24 *parahaemolyticus* if the current value of  $N_e r$  were maintained, to values much higher than found in  
25 any species. We propose that panmixia is unstable in bacteria, and that persistent environmental  
26 species are likely to evolve barriers to genetic exchange, which act to prevent a continuous increase in  
27 diversity by enhancing genetic drift.

28 **Conclusions** Our results highlight the dynamic nature of bacterial population structures and imply  
29 that overall diversity levels found within a species are poor indicators of its size.

30

31 **Keywords**

32 Panmixia, bacterial population structure, effective population size, recombination, genetic diversity

33

34 **Background**

35 Bacteria are paragons of adaptability and make up more biomass than all organisms other than plants  
36 combined [1]. Many bacterial species have enormous population sizes, disperse effectively around the  
37 globe [2-5] and exhibit high rates of within-species homologous recombination [6]. Recombination  
38 progressively breaks down non-random associations between markers (linkage disequilibrium), so  
39 that in large populations, where pairs of individuals distantly related, linkage equilibrium is expected  
40 between all pairs of genomic sites. However, in most species for which data is available, there is  
41 substantial genome-wide linkage disequilibrium, indicating structuring of variation [7]. Here we

42 propose a resolution of this paradox, namely that large bacterial populations accumulate diversity  
43 progressively until that diversity acts as an effective barrier to genetic exchange between lineages.

44

45 We examine the population structure of 21 bacterial species and find that only the Asian population of  
46 *Vibrio parahaemolyticus* is close to genome-wide linkage equilibrium. We find that this population  
47 has undergone a recent expansion. If the current population size was maintained over evolutionary  
48 timescales, it would lead to a greater than 30 fold increase in diversity, to levels higher than found in  
49 any well characterized bacterial species. We propose that other environmental species with large  
50 census population sizes, for example *Vibrio cholerae* or *Klebsiella pneumoniae*, may have been  
51 through a similar stage before accumulating diversity and that this diversity acted to generate barriers  
52 to recombination, either directly or via selective pressure to reduce recombination rates between  
53 genetically divergent lineages.

54

55 Specifically, we use pairwise genetic distances between strains calculated from core genome  
56 sequences to estimate the recombination scaled effective population size parameter  $N_e r$ , where  $N_e$  is  
57 the effective population size and  $r$  is the recombination rate per site per generation, an approach  
58 briefly introduced by Cui et al [8]. Here, we test the method using simulated genomic datasets and  
59 find that it provides accurate estimates in constant size populations for values of the scaled  
60 recombination rate  $R$  (see below) of 5 or more, and responds to changes in population size or structure  
61 far more quickly than estimates of  $N_e$  based on nucleotide diversity. We apply the method to real  
62 genomic datasets from 21 species and find that some common species, such as *Escherichia coli*, have  
63 strikingly low estimates of  $N_e r$ , implying that recombination is inefficient in distributing diversity  
64 across the species, while for others the fit of model to data is poor, highlighting deviations from the  
65 assumption of a freely recombining population. Only datasets from *V. parahaemolyticus* and  
66 *Helicobacter pylori* give  $N_e r$  estimates greater than 100. The former has had a recent increase in  
67 population size, whereas the latter experienced repeated bottlenecks associated with geographical  
68 spread of its human host, implying that neither population is close to demographic equilibrium.

69

## 70 **Inference approach**

71 Population genetics is a century-old discipline that provides a powerful set of theoretical and  
72 statistical inference tools with which to interpret patterns of genetic variation between closely related  
73 organisms. Central to the theory is the concept of a population, which in outbreeding eukaryotes is a  
74 set of organisms that share a common gene pool. The simplest models assume panmixia which means  
75 random mating of all individuals within a single closed population [9]. In most animals and plants  
76 mating is structured by geography, however even low levels of migration between locations, of the  
77 order of one individual per generation, can prevent differences from accumulating between local  
78 populations, making random mating a reasonable first approximation for many outbreeding species.  
79 Under neutral theory [10], the expected level of genetic diversity  $\pi$  depends on the per generation  
80 mutation rate  $\mu$  and the effective population size  $N_e$ , which is the number of individuals contributing  
81 to the gene pool in each generation [11].

82

83 Outbreeding eukaryotes receive genetic material from the gene pool when they are born and  
84 contribute to it when they reproduce. Individuals are more similar to immediate relatives than they are  
85 to other members of the population, but the proportion of the genome shared by descent from  
86 particular ancestors decays rapidly with each successive generation, declining from 1/2 for full  
87 siblings to 1/8 for first cousins and 1/32 for second cousins. In small random samples from  
88 populations with more than a few hundred individuals, shared recent ancestry is rare and can be  
89 neglected for many types of analysis.

90

91 Bacteria reproduce by binary fission and only receive material from the gene pool or contribute to it  
92 via homologous or non-homologous recombination [12]. Many cell divisions can take place between  
93 consecutive recombination events, and typically recombination only affects a small fragment of the  
94 genome. These properties mean that the concept of a gene pool or a population is less straightforward  
95 to define than for outbreeding organisms. It is still possible to estimate the effective population size  
96  $N_e$  from the average nucleotide diversity  $\pi$ , based on the standard assumptions of population genetic

97 theory, but the assumptions are both less reasonable and harder to test for bacteria than for  
98 outbreeding eukaryotes, in which population boundaries can be delineated empirically using well  
99 established methods [13]. For example, nucleotide diversity in a species like *E. coli* can be estimated  
100 for clonal lineages, phylogroups, species or for the *Escherichia* genus as a whole. These choices lead  
101 to very different values for  $\pi$  and hence for  $N_e$  and it is not obvious a priori which is most meaningful.  
102 All methods lead to estimates of effective population size that are many orders of magnitude smaller  
103 than the census number of bacteria [14].

104

105 Here, we take a different approach which is to estimate a scaled version of the effective population  
106 size,  $N_e r$ , where  $r$  is the per generation rate at which a given site recombines. Note in particular that  
107 this parameter  $r$  is the product of the per initiation site recombination rate  $\rho$  and mean tract length  $\delta$   
108 used in many bacterial recombination models [15, 16]. High values of  $N_e r$  indicate that the population  
109 structure is similar to that of outbreeding eukaryotes. Informally, in eukaryotic population each  
110 individual is the product of a separate meiosis and therefore genetically distinct.  $N_e$  is the number of  
111 genetically distinct individuals that contribute in each generation, which is typically in the thousands  
112 or millions.  $N_e r$  is designed to measure an analogous quantity in bacteria, namely the number of  
113 genetically distinct organisms that contribute to the future bacterial gene pool. To this end, time is  
114 rescaled;  $N_e$  measures the rate of genetic drift per bacterial generation, while  $N_e r$  measures the  
115 genetic drift in proportion to the time it takes for strains to become distinct from their ancestors by  
116 importing DNA by homologous recombination.

117

118 The recombination rate of *V. parahaemolyticus* is  $r = 1.7 \times 10^{-4}$  per site per year [17]. After  $T$  years of  
119 evolution, the expected proportion of recombined genome is  $e^{-rT}$ , so that it takes around 4,000 years  
120 on average for half of the genome to recombine. Half of this time is approximately equivalent to a  
121 eukaryotic generation in the sense that two strains that shared a common ancestor 2,000 years ago will  
122 be about as related as siblings. This represents a very different time scale from that assumed based on

123 bacterial generations. For example, *V. parahaemolyticus* is capable of replicating in less than ten  
124 minutes in appropriate conditions [18].

125

126 We estimate  $N_e r$  using the pairwise genetic distances between strains, based on a number of  
127 simplifying assumptions which are likely to hold true in freely recombining bacterial populations but  
128 may break down in species where recombination rates are low or genetic exchange is structured by  
129 geography or lineage. Specifically, the calculations assume that recombination introduces many more  
130 substitutions than mutation, happens at the same rate throughout the genome and that each  
131 recombination event introduces unrelated DNA from the population into the imported stretch. If  
132 unrelated strains differ on average at  $d_{\text{unrelated}}$  nucleotides throughout the alignment, then the  
133 expected number of SNPs distinguishing strains with a common ancestor at time  $T$  in the past is  
134  $d = d_{\text{unrelated}} (1 - e^{-2rT})$ .

135

136 To use these times to estimate the effective population size, we assume that the genealogy of clonal  
137 relationships is generated by a coalescent model with a constant population size  $N_e$  [19, 20]. This  
138 model generates expectations for the times in the past at which common ancestors of strains in a  
139 sample existed. Specifically, for a sample of  $n$  strains, there are  $n - 1$  coalescent nodes. The age of  
140 the most recent node corresponds to the common ancestor of the two most closely related strains in  
141 the sample, while the  $(n - 1)^{\text{th}}$  node corresponds to the common ancestor of all the strains in the  
142 sample.

143

144 Coalescent theory implies that the expected time in the past at which the  $m^{\text{th}}$  most ancient coalescent  
145 event occurs is  $T_m = 2N_e \left( \frac{1}{m} - \frac{1}{n} \right)$ . These times can be converted into expected genetic distances  $d_m$   
146 using the formula in the previous paragraph. We use the UPGMA algorithm to obtain  $n - 1$   
147 coalescent distances from the  $n(n - 1)/2$  pairwise genetic distances between strains and find the  
148 values of  $N_e r$  and  $\hat{n}$  (effective sample size, see below) that gives the best fit between observed and  
149 expected distances for the  $n - 1$  coalescent nodes.

150

151 Note that for bacteria with high recombination rate, the genome is likely to have been scrambled up  
152 sufficiently that strains will have inherited little or no DNA by direct descent from the common  
153 ancestor of the entire sample. This means that the genetic distances expected for the oldest coalescent  
154 events plateau at  $d_{\text{unrelated}}$ . In graphical representations, it is convenient to show the coalescent events  
155 in chronological order with the oldest first, to aid comparisons between datasets with different sample  
156 sizes.

157

158 The model assumes that the strains are randomly sampled from a homogeneous population at a single  
159 time point, but pathogenic clones, epidemic outbreaks or strains from specific locations are often  
160 overrepresented in real data, leading to oversampling of very closely related isolates, relative to their  
161 frequency in the global population [7, 21]. Therefore, in addition to  $N_e r$  we estimate a second  
162 parameter  $\hat{n}$  called the effective sample size, which is an estimate of the number of strains remaining  
163 when over-sampled clonally related strains are removed. For simulated data where sampling is  
164 random,  $\hat{n}$  is correctly estimated to be very close to number of strains in the sample, so this additional  
165 parameter makes little difference to the inference. For real data, estimating this additional parameter  
166 often improves the qualitative model fit considerably.

167

## 168 **Results**

### 169 **$N_e r$ can be estimated accurately for simulated data**

170 Fig. 1 illustrates the effect of varying the recombination rate in genomes simulated using FastSimBac  
171 [22]. The simulations include 200 genomes of length 2 Mb under a coalescent model with constant  
172 effective population size  $N_e$ . We fix the recombination tract length  $\delta = 1,000$  and vary the rate of  
173 initiation of recombination events  $\rho$  per  $2N_e$  generations (0.001 to 0.1), so that the scaled  
174 recombination rate  $R = \frac{\delta\rho}{2N_e}$  varies by two orders of magnitude, from 0.5 to 50. We also fix the rate of  
175 initiation of recombination event  $\rho$  (0.01) and vary the recombination tract length  $\delta$  (100 to 10,000).  
176 Both methods give similar results, for low scaled recombination rates, the phylogenetic tree is highly

177 structured but becomes progressively bushier as  $R$  increases, and gives the impression of being a  
178 nearly perfect star for  $R = 50$ . For high  $R$ , the estimated  $N_e r$  is close to  $R$  and the observed genetic  
179 distances are well-fit by the model. For lower  $R$ , the fit is less good and the estimate of  $R$  provided by  
180  $N_e r$  is also less accurate, although it remains of the right order. For these parameter values, the size  
181 and shape of the phylogenetic tree are highly variable between runs, and the poorer fit reflects this  
182 stochasticity as well as greater inaccuracy in the approximations made in converting between genetic  
183 distances and coalescent times.

184

185 Further simulations of more complex scenarios (Supplementary Fig. 1) show that  $N_e r$  estimates  
186 reflect the current demography of the population more closely than estimates based on  $\pi$ , which is  
187 more influenced by past demography and migration to and from different demes. Supplementary Fig.  
188 1a shows the effect of a population expansion on estimates of  $N_e r$ . At time  $t$ , a single population with  
189 scaled recombination rate  $R = 5$  splits into two. The blue population maintains the ancestral  
190 population size while the red population becomes 10 times larger. At time  $t + 0.05$  the red population  
191 is only marginally more diverse than the blue one but its estimated value of  $N_e r$  is 6 fold higher. The  
192 fit of observed and expected genetic distances is poor for the red population, reflecting the inaccuracy  
193 of the modelling assumption that there is a single unchanging population size. At time  $t + 0.2$  the  
194 estimate of  $N_e r$  is close to its true post-split value for both populations and the model fit is  
195 substantially improved. Merging data from the two populations gives intermediate estimates of  $N_e r$ .

196

197 Supplementary Fig. 1b shows the effect of a population size reduction. A single population with  $R =$   
198 50 splits into two, with the blue population remaining unchanged while the red population undergoes  
199 a 10 fold reduction in size. As in Supplementary Fig. 1a, the model fit for the red population is poor  
200 immediately after the split but quickly improves, with the estimate of  $N_e r$  approaching the correct  
201 value of 5, while the nucleotide diversity of the population reduces much more slowly. Supplementary  
202 Fig. 1c shows the effect of symmetric migration between two populations with a 10 fold difference in  
203 effective population size. Migration has a large effect on nucleotide diversity, especially for the



204 smaller population, but has little effect on estimates of  $N_e r$ . Overall, these results show that our  
205 inference approach provides accurate estimates of the recombination-scaled effective population size  
206 for simulated data and that deviations between observed and expected genetic distances can be  
207 informative about deviations from model assumptions.

208

### 209 **Application to *V. parahaemolyticus* genomes**

210 We first applied the method to the 1,103 *V. parahaemolyticus* genomes described in Yang et al [17].  
211 For this dataset, we obtained estimates of  $N_e r = 484$  and  $\hat{n} = 471$  (Fig. 2a).  $\hat{n}$  is less than half of the  
212 sample size principally because a large fraction of the isolates in the sample belong to pandemic  
213 clonal lineages responsible for large numbers of human infections. Both lineages have most recent  
214 common ancestors within the last few decades and are likely to represent a very small fraction of the  
215 global population of *V. parahaemolyticus*. The genetic distances fit the model well except that the 33  
216 oldest coalescent events, on the left hand side of the plot are larger than  $d_{\text{unrelated}}$ . The discrepancy is  
217 largely due to population structure within the species, since the fit is better, although still not perfect  
218 when analysis is restricted to the 944 isolates from the VppAsia population (Fig. 2a).

219

220 As described by Yang et al., the sample of *V. parahaemolyticus* is subdivided into 4 modestly  
221 differentiated populations, likely due to historical barriers to migration between oceans [17]. For the  
222 VppAsia population  $N_e r$  was estimated to be 453 which is similar to that for the dataset as a whole,  
223 while other populations have substantially smaller values. These differences are not simply due to a  
224 larger sample size since estimates based on subsets of the VppAsia data are consistently greater than  
225 200 (Fig. 2b). Sampling strategy does make some difference, since estimates are lower for a dataset  
226 consisting only of clinical strains than of shellfish, fish or all non-clinical isolates (Fig. 2c). This  
227 difference presumably reflects variation in disease causing potential, which results in samples of  
228 clinical isolates not representing the full diversity of clonal lineages within the species.

229

### 230 **Application to multiple bacterial species**

231 We also applied the method to a survey of other bacteria for which large numbers of genomes are  
232 publically available (Supplementary Fig. 2). *V. cholerae* has an estimate of  $N_e r$  of 29, while *Vibrio*  
233 *vulnificus* has a value of 43. Although the sample sizes available are relatively limited, in contrast to  
234 the Asian population of *V. parahaemolyticus*, the genetic distances do not show a clear plateau  
235 corresponding to a single value for  $d_{\text{unrelated}}$  and while there are a continuous range of coalescent  
236 distances, the overall fit between model and data is poor. Thus, although the other *Vibrio* species in  
237 our dataset recombine frequently they are far from being panmictic.

238

239 *H. pylori* has the largest estimated value of  $N_e r$  of all datasets we analysed. *H. pylori* is characterized  
240 by extremely high rates of recombination during mixed infection of the human stomach, with 10% or  
241 more of the genome recombined during a single infection [23] and linkage disequilibrium decreases  
242 much more rapidly as a function of genetic distance than for all other species, including *V.*  
243 *parahaemolyticus* (Fig. 3a). Although the tree is approximately star-like, the fit of the model is not  
244 perfect, with no clear plateau for a single value of  $d_{\text{unrelated}}$ , due to the complex geographical  
245 population structure of the species [24].

246

247 Amongst the other species,  $N_e r$  varies from 1 for *Chlamydia trachomatis* to 88 for *Salmonella*  
248 *enterica*. The overall fit of the model varies considerably between species (Supplementary Fig. 2) and  
249 is typically worst for the oldest coalescent events, as examined in more detail above for *V.*  
250 *parahaemolyticus*. Our estimated  $N_e r$  values are correlated with the linkage disequilibrium statistic  $r^2$   
251 measured between distant markers at pairwise distance of 3 kb (Fig. 3b). However,  $N_e r$  shows no  
252 correlation with nucleotide diversity of synonymous sites  $\pi_{\text{syn}}$  (Fig. 3c) and  $r^2$  at pairwise distance of  
253 3 kb also shows no correlation with  $\pi_{\text{syn}}$  (Fig. 3d).

254

## 255 **Discussion**

### 256 **Structure of genetic diversity in 21 bacterial species**

257 In bacteria, adaptation to diverse environmental challenges should be most effective in species where  
258 realized recombination rates are high enough to thoroughly mix up genetic variation (panmixia), since  
259 this creates the largest possible pool of genotypes on which natural selection can act. High  
260 recombination can also make it easier for researchers to detect the imprint of natural selection, a  
261 feature exploited by Cui et al. 2015, 2018 [8, 25] in investigating coadaptation in *Vibrio*  
262 *parahaemolyticus*. However, despite the utility of well-mixed gene pools, both to the species that have  
263 it and to the researchers studying it, it appears to be rare in bacteria for which large numbers of  
264 genomes are currently available.

265

266 The genetic structure of bacteria species depends on the interplay of many different processes,  
267 including changes in population size over time, geographical and ecological subdivision and the  
268 complex biology of genetic exchange which takes place via conjugation, transformation and  
269 transduction. As a result no single parameter summarizes the effect of recombination in breaking  
270 down linkage disequilibrium. Furthermore, available genomes rarely come close to being a random  
271 sample of the bacterial population from which they are taken.

272

273 Here we have used two summary statistics of the effectiveness of recombination; a non-parametric  
274 measure of long-range linkage disequilibrium,  $r^2$  between markers 3 kb apart on the genome, and a  
275 parametric approach estimating the composite population genetic parameter  $N_e r$ . Informally, high  
276 values of  $N_e r$  implies that recombination has generated new clonal complexes quickly compared to  
277 the rate at which genetic drift (proportional to  $1/N_e$ ) removes them, with the result there are many  
278 distinct clonal-complexes segregating in the population. In data simulated according to a coalescent  
279 model with recombination of short tracts, estimated values of  $N_e r$  are close to the true values for  
280  $N_e r > 2$ .

281

282 In our survey of 21 species from which large numbers of genomes are available, our two summary  
283 statistics are strongly but incompletely correlated ( $R^2 = 0.69$ ,  $P < 0.01$ , Fig. 3b). According to both

284 statistics, two species are clear outliers, with estimates of  $N_e r = 453$  for the Asian population of *V.*  
285 *parahaemolyticus* and 1,976 for the hpEurope population of *H. pylori*, and the estimated value of  $N_e r$   
286 was lower than 100 in the other 19 species, which are therefore far from being panmictic.

287

288 Estimated  $N_e r$  or  $r^2$  are uncorrelated with the nucleotide diversity of synonymous sites  $\pi_{syn}$  (Fig. 3c,  
289 Fig. 3d). For example, *V. parahaemolyticus* has similar diversity to *V. cholerae* and much lower  
290 diversity than *V. vulnificus*, both of which have estimated  $N_e r$  lower than 50. Furthermore, estimates  
291 of  $N_e r$  vary over a factor of 1,000, while  $\pi$  varies only by a factor of 10.

292

### 293 **Mechanisms by which high diversity can create barriers to recombination**

294 Since panmixia is possible within bacterial populations and should facilitate genetic adaptation to the  
295 widest possible range of niches available to the species, it raises the question why it is not widespread.

296 There are several bacterial species in our sample which survive well in the environment, have  
297 effective global dispersal, enormous census population sizes and high recombination rates, such as *E.*  
298 *coli*, *Campylobacter jejuni* and *K. pneumoniae*. Species with these characteristics are the most  
299 obvious candidates to be panmictic, whereas *V. parahaemolyticus* thrives only in warm brackish  
300 waters and has oceanic gene pools, implying historical limits on its dispersal [17], and *H. pylori* only  
301 survives in human stomachs and shows geographic differentiation associated with historical  
302 migrations of its host [26].

303

304 Neutral population genetic models imply that, all else being equal, bacteria with higher census  
305 population sizes should have higher  $N_e r$  as well as higher nucleotide diversity, which is proportional  
306 to  $2N_e \mu$  at equilibrium. However, across our 21 species, there is no correlation between the two  
307 statistics. We propose that the absence of a correlation occurs because high diversity tends to  
308 suppresses recombination. There are a number of mechanisms by which this suppression can occur that  
309 have been described in the literature and we do not attempt to reach a conclusion about which are in  
310 fact most important in nature.

311

312 For example, in Cui et al [25], we observe nascent boundaries to genetic exchange between lineages  
313 of *V. parahaemolyticus* associated with differentiation into ecological types. This kind of genetic  
314 differentiation is more likely to be common, and more likely to lead to barriers to exchange in more  
315 diverse bacterial populations, which tend to have more diverse accessory genomes [27], and might  
316 also have a larger number of distinct ecological niches. Such barriers can result in speciation [21, 28]  
317 but can also lead to genetic structuring within a single species, such as host-specific gene pools found  
318 in *C. jejuni* [29].

319

320 Another mechanism is changes in the pattern or rate of recombination. Recombination requires  
321 homology between donor and recipient DNA to be recognized by the cellular machinery and, in  
322 addition, most species have a mismatch repair system, which aborts the process if there are too many  
323 differences. Therefore, as homology decreases, so will recombination [23, 28, 30, 31]. Mismatch  
324 dependent recombination is likely to be the main reason why *E. coli* has an estimated value of  $N_e r$  of  
325 only 12, implying that recombination is ineffective in reassorting variation across the whole species  
326 [32].

327

328 Finally, a genetic dependence of recombination rates on diversity might arise from effects of epistasis  
329 in constraining realized recombination. Simulations of facultatively sexual organisms have shown  
330 that selection on multiple interacting loci can lead to populations being dominated by small numbers  
331 of clones, even in the presence of frequent recombination [33]. These simulations also show that a  
332 phase transition from panmixia can take place due to a decrease in recombination rate or even an  
333 increase in population size.

334

### 335 ***Vibrio parahaemolyticus* and *Helicobacter pylori* are far from demographic equilibrium**

336 If, as we propose, suppression of recombination due to high diversity is a general phenomenon in  
337 bacteria, then the existence of populations with high  $N_e r$  might seem paradoxical, because high  $N_e$   
338 leads to high diversity which should suppress  $r$ . However this argument only holds in populations

339 where  $N_e$  has been high for long enough for diversity to accumulate and do not apply if high  $N_e$  is a  
340 recent phenomenon on an evolutionary timescale.

341

342 In fact, neither the Asian population of *V. parahaemolyticus* nor *H. pylori* are close to demographic  
343 equilibrium. As proposed in Yang et al [17], the Asian population of *V. parahaemolyticus*, VppAsia,  
344 has spread within the last few decades due to human activity but has an ancestral range restricted to  
345 coastal waters from India to Japan. The other *V. parahaemolyticus* populations that we have sampled,  
346 with different ancestral ranges, have smaller estimated  $N_e r$ , perhaps because they have smaller or less  
347 fecund ranges or experience greater competition or more frequent demographic bottlenecks.

348

349 Crucially, it seems that the ancestral population size of *V. parahaemolyticus* as a whole was smaller  
350 than currently found in VppAsia and more similar to that in the other populations. First, the site  
351 frequency spectrum of VppAsia, but not the other populations, is out of equilibrium and is  
352 approximately consistent with a demographic scenario in which the effective population size  
353 increased by a factor of ten 15,000 years ago (Supplementary Fig. 3). One possible scenario is that the  
354 end of the last ice age around 11,000 years ago created a habitat that existed till the present and that  
355 the population expansion implied by the site frequency spectrum is due to a demographic expansion at  
356 the end of the ice age.

357

358 Secondly the level of synonymous nucleotide diversity in the population is 30-fold lower than  
359 expected at demographic equilibrium.  $r/\mu$ , the number of recombinant sites for each mutant site, has  
360 been estimated for the species to be around 313 [17]. Note that this parameter  $r/\mu$  is not the same as  
361 the parameter  $r/m$  often used in the literature [6] because the former considers all recombined sites  
362 whereas the latter considers only recombinant sites that are substituted. If nucleotide diversity reached  
363 an equilibrium, consistent with the current value of  $N_e r$  of VppAsia, this would predict a value of

364  $2N_e\mu = 2N_e r \left(\frac{\mu}{r}\right) = 2 \times 453 \times \left(\frac{1}{313}\right) = 2.9$ . At equilibrium in a neutrally evolving population,

365 with sites evolving according to the Jukes-Cantor model,  $\pi$  is predicted to be equal to  $\frac{3}{4} \times$

366  $\left(1 - e^{-\frac{8N_e\mu}{3}}\right) = 0.73$ , and therefore most synonymous sites should differ between individuals. This is  
367 far from the current value of 0.024 or indeed diversity levels in any well-characterised bacterial  
368 species. Our simulation results show that estimates of  $N_e r$  respond much more quickly to changes in  
369 demography than  $\pi$ , implying that diversity levels would be likely to continue a slow but steady rise if  
370 the effective population size remains constant (ignoring the changes in population structure caused by  
371 human activity in recent decades).

372

373 The equivalent argument is more complex in *H. pylori* due to its geographic population structure but  
374 levels of variation are clearly far from demographic equilibrium, as illustrated by the substantial  
375 variation between populations that reflects bottlenecks associated with historical human migration  
376 rather than current population sizes [26]. These results therefore suggest that if effective population  
377 sizes remain continuously high in either species, then diversity would increase. We propose that in  
378 this case, barriers to recombination would evolve, perhaps by one of the mechanisms described above.

379

380 Despite decades of study by population geneticists, the factors determining the amount of diversity  
381 within species are still poorly understood, for example with much lower variation in nucleotide  
382 variation  $\pi$  between species than is expected based on variation in census population size in many  
383 domains of life [34, 35]. Our results suggest that patterns of genome variation in bacteria are likely to  
384 be dynamic, with ecological and genomic differentiation, barriers to gene flow and demographic  
385 factors interacting with each other in complex ways to alter both the level of genetic diversity within  
386 the species and the way it is partitioned, to produce the wide variety of bacterial population structures  
387 that are observed.

388

## 389 **Material and methods**

### 390 **Genomic datasets used in analysis**

391 Because our inference approach of  $N_e r$  hypothesizes that recombination drives the genetic variation  
392 other than mutation, we firstly selected 27 bacterial species, in which  $r/m$  values (ratio of nucleotide

393 changes resulted from recombination relative to point mutation) of them were greater than one based  
394 on previous multi-locus sequence typing data estimation [6]. We then counted the number of  
395 assembled genomes of them in NCBI database, and found that the genome numbers of 21 bacterial  
396 species were greater than 100, which were used in further analysis, including *Bacillus thuringiensis*,  
397 *Burkholderia pseudomallei*, *Campylobacter jejuni*, *Chlamydia trachomatis*, *Enterococcus faecalis*,  
398 *Escherichia coli*, *Flavobacterium psychrophilum*, *Haemophilus influenzae*, *Helicobacter pylori*,  
399 *Klebsiella pneumoniae*, *Legionella pneumophila*, *Leptospira interrogans*, *Neisseria meningitidis*,  
400 *Porphyromonas gingivalis*, *Pseudomonas syringae*, *Salmonella enterica*, *Streptococcus pneumoniae*,  
401 *Streptococcus pyogenes*, *Vibrio cholerae*, *Vibrio parahaemolyticus* and *Vibrio vulnificus*.

402

403 For species with more than 500 genomes in NCBI database, such as *E. coli* (>14,000 assembled  
404 genomes), 500 genomes were randomly selected to reduce the amount of calculation. Each genome  
405 was aligned against the reference genome of the corresponding species (Supplementary Table 1) using  
406 MUMmer [36] to generate the whole genome alignments and identify SNPs in core genomes (regions  
407 presented in all isolates) as previously described [8, 17]. Only genomes with genome-wide coverage >  
408 70% (compared to reference genome) were used in further analysis. SNPs located in repetitive regions  
409 were removed, and the filtered bi-allelic SNPs sets were used to construct the Neighbour-joining (NJ)  
410 tree of each species. Strains located on the extremely long branches of the NJ tree and strains  
411 belonged to clonal groups were manually removed, finally resulting in a dataset of 6,355 genomes  
412 (56-1,103 genomes for each species). The accession numbers of genomes used (excluding *H. pylori*  
413 and *V. parahaemolyticus*) were listed in Supplementary Table 1, and the whole-genome alignments  
414 were available in the figshare data repository (<https://figshare.com/s/3f9d04a8229f30dd785b>).

415

#### 416 **SNP calling, phylogeny reconstruction and LD decay calculation**

417 The SNP dataset of 278 *H. pylori* (hpEurope population) and 1,103 *V. parahaemolyticus* genomes  
418 were reused from previous studies [17, 37]. The SNPs of the left 4,974 genomes were recalled using  
419 same pipelines as described above. Totally 17,875-462,214 bi-allelic SNPs were identified separately  
420 for 21 bacterial species, which were used in further analysis, including Neighbour-joining tree



421 construction, pairwise SNP distance calculation, LD  $r^2$  value calculation, and  $N_e r$  estimation as  
422 previously described [8]. The Neighbour-joining trees were constructed using the software Treebest  
423 (<http://treesoft.sourceforge.net/treebest.shtml>) based on concatenated SNPs. Haploview [38] was used  
424 to calculate the LD  $r^2$ , and the maximum comparison distance was set to 30 kb.

425

## 426 **Simulation**

427 The software FastSimBac [22] was used to generate the simulated bacterial populations under  
428 different hypothetical evolution scenarios, including a constant population with different scaled  
429 recombination rate  $R$  (Fig. 1), and the changing populations with population expansion  
430 (Supplementary Fig. 1a), reduction (Supplementary Fig. 1b) and migration (Supplementary Fig. 1c).  
431 All the simulated genome length was set to 2 Mb, mutation rate was fixed at 0.01 (per site per  $2N_e$   
432 generations). The detailed parameters used in simulation were listed in Supplementary Table 2.

433

## 434 **Recombination scaled effective population size estimation**

435 For a freely mixing population in which recombination drives diversification, neutral theory predicts  
436 that  $N_e r$  is in proportion to genealogical coalescent rate, and the expected coalescent curves can be  
437 estimated based on the formula  $d = d_{\text{unrelated}}(1 - \exp(-4N_e r (\frac{1}{m} - \frac{1}{n})))$  as mentioned in previous  
438 work [8]. In the formula,  $d$  is the expected pairwise genetic divergence,  $d_{\text{unrelated}}$  is the median  
439 pairwise SNP distance of a population,  $n$  is the number of individual strains and  $m$  is the index of the  
440 ancestral node along the coalescent tree of  $n$  strains. Coalescent curves can be estimated using the  
441 UPGMA algorithm based on the pairwise SNP distance. By fitting the expected and observed  
442 coalescent curves with least square method to search for the optimal parameters, we found the optimal  
443 values of  $\hat{n}$  (effective sample size) and  $N_e r$  that were used in further analysis.  $\hat{n}$  was an estimate of  
444 the number of strains remaining when over-sampled clonally related strains are removed.

445

## 446 **Site frequency spectrum estimation**

447 The minor allele frequency (MAF) of each SNP locus in a SNP matrix was calculated and then the  
448 frequency of SNP positions at each MAF level were counted to generate the site frequency spectrum  
449 (SFS) for each dataset. To get a comparable result, the SFS showed in each Figure or panel was  
450 calculated based on same sample size. In Supplementary Fig. 3a, the merged population was  
451 generated by randomly selecting 100 genomes from each of Pop1 and Pop2. In Supplementary Fig.  
452 3b, the same number of genomes as in the real genome dataset were simulated to show populations  
453 with different evolution scenarios.

454

#### 455 **Acknowledgements**

456 This work is supported by the National Key Research & Development Program of China (No.  
457 2017YFC1200800, 2017YFC1601503, and 2016YFC1200100), the National Key Program for  
458 Infectious Diseases of China (No. 2017ZX10104002), the National Natural Science Foundation of  
459 China (No. 31770001) and Sanming Project of Medicine in Shenzhen (No. SZSM201811071). D.F. is  
460 funded by a Medical Research Council Fellowship as part of the MRC CLIMB consortium for  
461 microbial bioinformatics (grant number MR/M501608/1).

462

#### 463 **Author Contributions**

464 D. F., Y. C., and R. Y. designed the study and coordinated the project; C. Y., Y. C., X. D., and D. F.  
465 analyzed the data; D. F. wrote the manuscript. All authors approved the final version of the  
466 manuscript.

467

#### 468 **Competing Financial Interests statement**

469 None

470

#### 471 **References**

- 472 1. Bar-On YM, Phillips R, Milo R: **The biomass distribution on Earth.** *Proc Natl Acad Sci U S A*  
473 2018, **115**:6506-6511.

- 474 2. Hendriksen RS, Vieira AR, Karlsmose S, Lo Fo Wong DM, Jensen AB, Wegener HC, Aarestrup  
475 FM: **Global monitoring of Salmonella serovar distribution from the World Health**  
476 **Organization Global Foodborne Infections Network Country Data Bank: results of quality**  
477 **assured laboratories from 2001 to 2007.** *Foodborne pathogens and disease* 2011, **8**:887-  
478 900.
- 479 3. Pike BL, Guerry P, Poly F: **Global distribution of Campylobacter jejuni Penner serotypes: a**  
480 **systematic review.** *PloS one* 2013, **8**:e67375.
- 481 4. Holt KE, Wertheim H, Zadoks RN, Baker S, Whitehouse CA, Dance D, Jenney A, Connor TR,  
482 Hsu LY, Severin J: **Genomic analysis of diversity, population structure, virulence, and**  
483 **antimicrobial resistance in Klebsiella pneumoniae, an urgent threat to public health.**  
484 *Proceedings of the National Academy of Sciences* 2015, **112**:E3574-E3581.
- 485 5. Stoppe NC, Silva JS, Carlos C, Sato MIZ, Saraiva AM, Ottoboni LMM, Torres TT: **Worldwide**  
486 **Phylogenetic Group Patterns of Escherichia coli from Commensal Human and Wastewater**  
487 **Treatment Plant Isolates.** *Front Microbiol* 2017, **8**:2512.
- 488 6. Vos M, Didelot X: **A comparison of homologous recombination rates in bacteria and**  
489 **archaea.** *ISME J* 2009, **3**:199-208.
- 490 7. Smith JM, Smith NH, O'Rourke M, Spratt BG: **How clonal are bacteria?** *Proc Natl Acad Sci U S*  
491 *A* 1993, **90**:4384-4388.
- 492 8. Cui Y, Yang X, Didelot X, Guo C, Li D, Yan Y, Zhang Y, Yuan Y, Yang H, Wang J, et al: **Epidemic**  
493 **Clones, Oceanic Gene Pools, and Eco-LD in the Free Living Marine Pathogen Vibrio**  
494 **parahaemolyticus.** *Mol Biol Evol* 2015, **32**:1396-1410.
- 495 9. Wright S: **The genetical structure of populations.** *Ann Eugen* 1951, **15**:323-354.
- 496 10. Tajima F: **Statistical method for testing the neutral mutation hypothesis by DNA**  
497 **polymorphism.** *Genetics* 1989, **123**:585-595.
- 498 11. Wang J: **Estimation of effective population sizes from data on genetic markers.** *Philos Trans*  
499 *R Soc Lond B Biol Sci* 2005, **360**:1395-1409.

- 500 12. Didelot X, Maiden MC: **Impact of recombination on bacterial evolution.** *Trends Microbiol*  
501 2010, **18**:315-322.
- 502 13. Pritchard JK, Stephens M, Donnelly P: **Inference of population structure using multilocus**  
503 **genotype data.** *Genetics* 2000, **155**:945-959.
- 504 14. Fraser C, Hanage WP, Spratt BG: **Recombination and the nature of bacterial speciation.**  
505 *Science* 2007, **315**:476-480.
- 506 15. Didelot X, Falush D: **Inference of bacterial microevolution using multilocus sequence data.**  
507 *Genetics* 2007, **175**:1251-1266.
- 508 16. Didelot X, Lawson D, Darling A, Falush D: **Inference of homologous recombination in**  
509 **bacteria using whole-genome sequences.** *Genetics* 2010, **186**:1435-1449.
- 510 17. Yang C, Pei X, Wu Y, Yan L, Yan Y, Song Y, Coyle N, Martinez-Urtaza J, Quince C, Hu Q, et al:  
511 **Recent mixing of *Vibrio parahaemolyticus* populations.** *bioRxiv* 2018.
- 512 18. Makino K, Oshima K, Kurokawa K, Yokoyama K, Uda T, Tagomori K, Iijima Y, Najima M,  
513 Nakano M, Yamashita A, et al: **Genome sequence of *Vibrio parahaemolyticus*: a pathogenic**  
514 **mechanism distinct from that of *V cholerae*.** *Lancet* 2003, **361**:743-749.
- 515 19. Kingman JFC: **The coalescent.** *Stochastic processes and their applications* 1982, **13**:235-248.
- 516 20. Rosenberg NA, Nordborg M: **Genealogical trees, coalescent theory and the analysis of**  
517 **genetic polymorphisms.** *Nat Rev Genet* 2002, **3**:380-390.
- 518 21. Fraser C, Hanage WP, Spratt BG: **Neutral microepidemic evolution of bacterial pathogens.**  
519 *Proc Natl Acad Sci U S A* 2005, **102**:1968-1973.
- 520 22. De Maio N, Wilson DJ: **The Bacterial Sequential Markov Coalescent.** *Genetics* 2017,  
521 **206**:333-343.
- 522 23. Cao Q, Didelot X, Wu Z, Li Z, He L, Li Y, Ni M, You Y, Lin X, Li Z, et al: **Progressive genomic**  
523 **convergence of two *Helicobacter pylori* strains during mixed infection of a patient with**  
524 **chronic gastritis.** *Gut* 2015, **64**:554-561.

- 525 24. Falush D, Wirth T, Linz B, Pritchard JK, Stephens M, Kidd M, Blaser MJ, Graham DY, Vacher S,  
526 Perez-Perez GI, et al: **Traces of human migrations in *Helicobacter pylori* populations.**  
527 *Science* 2003, **299**:1582-1585.
- 528 25. Cui Y, Yang C, Qiu H, Wang H, Yang R, Falush D: **The landscape of coadaptation in *Vibrio***  
529 **parahaemolyticus.** *bioRxiv* 2018.
- 530 26. Linz B, Balloux F, Moodley Y, Manica A, Liu H, Roumagnac P, Falush D, Stamer C, Prugnolle F,  
531 van der Merwe SW, et al: **An African origin for the intimate association between humans**  
532 **and *Helicobacter pylori*.** *Nature* 2007, **445**:915-918.
- 533 27. Andreani NA, Hesse E, Vos M: **Prokaryote genome fluidity is dependent on effective**  
534 **population size.** *ISME J* 2017, **11**:1719-1721.
- 535 28. Falush D, Torpdahl M, Didelot X, Conrad DF, Wilson DJ, Achtman M: **Mismatch induced**  
536 **speciation in *Salmonella*: model and data.** *Philos Trans R Soc Lond B Biol Sci* 2006, **361**:2045-  
537 2053.
- 538 29. Sheppard SK, Cheng L, Meric G, de Haan CP, Llarena AK, Marttinen P, Vidal A, Ridley A,  
539 Clifton-Hadley F, Connor TR, et al: **Cryptic ecology among host generalist *Campylobacter***  
540 **jejuni in domestic animals.** *Mol Ecol* 2014, **23**:2442-2451.
- 541 30. Retchless AC, Lawrence JG: **Temporal fragmentation of speciation in bacteria.** *Science* 2007,  
542 **317**:1093-1096.
- 543 31. Stephan W, Langley CH: **Evolutionary consequences of DNA mismatch inhibited repair**  
544 **opportunity.** *Genetics* 1992, **132**:567-574.
- 545 32. Didelot X, Meric G, Falush D, Darling AE: **Impact of homologous and non-homologous**  
546 **recombination in the genomic evolution of *Escherichia coli*.** *BMC Genomics* 2012, **13**:256.
- 547 33. Neher RA, Shraiman BI: **Competition between recombination and epistasis can cause a**  
548 **transition from allele to genotype selection.** *Proc Natl Acad Sci U S A* 2009, **106**:6866-6871.
- 549 34. Lynch M: **Evolution of the mutation rate.** *Trends Genet* 2010, **26**:345-352.

- 550 35. Leffler EM, Bullaughey K, Matute DR, Meyer WK, Segurel L, Venkat A, Andolfatto P,  
551 Przeworski M: **Revisiting an old riddle: what determines genetic diversity levels within**  
552 **species?** *PLoS Biol* 2012, **10**:e1001388.
- 553 36. Delcher AL, Salzberg SL, Phillippy AM: **Using MUMmer to identify similar regions in large**  
554 **sequence sets.** *Curr Protoc Bioinformatics* 2003, **Chapter 10**:Unit 10 13.
- 555 37. Berthenet E, Yahara K, Thorell K, Pascoe B, Meric G, Mikhail JM, Engstrand L, Enroth H,  
556 Burette A, Megraud F, et al: **A GWAS on Helicobacter pylori strains points to genetic**  
557 **variants associated with gastric cancer risk.** *BMC Biol* 2018, **16**:84.
- 558 38. Barrett JC: **Haploview: Visualization and analysis of SNP genotype data.** *Cold Spring Harb*  
559 *Protoc* 2009, **2009**:pdb ip71.

560

## 561 **Figure legends**

562 **Figure 1. Recombination scaled effective population size ( $N_e r$ ) estimation of simulated constant**  
563 **populations under different scaled recombination rate.** The panels indicated populations with

564 scaled recombination rate  $R$  of 0.5 (a), 1 (b), 5 (c), 25 (d), 50 (e). From top to bottom, indicating the

565 NJ trees, distribution of pairwise SNP distance between individuals and observed and expected

566 coalescence curves. The dashed line of middle and bottom panels indicated the median SNP distance

567 between individuals. The red points in the bottom panel indicated the expected distances between  $n -$

568 1 coalescent nodes, the blue triangles indicated the observed distances estimated from pairwise SNP

569 distances using the UPGMA algorithm.

570

571 **Figure 2. Recombination scaled effective population size ( $N_e r$ ) estimation of *V.***

572 *parahaemolyticus*. (a)  $N_e r$  estimation of all the samples and four populations (VppAsia, VppX,

573 VppUS1 and VppUS2) of *V. parahaemolyticus*. Layout and colors are the same as in Figure 1. (b)

574  $N_e r$  estimation of VppAsia population based on different sample sizes. 100-500 genomes were

575 randomly selected from total 944 VppAsia genomes, 10 repeats were performed for each sample size

576 to create the boxplot. (c)  $N_e r$  estimation of VppAsia population based on different types of samples.

577 Points and lines show observed and expected coalescence curves, respectively.

578

579 **Figure 3. Correlation between  $N_e r$ , linkage disequilibrium (LD) statistic  $r^2$  and nucleotide**

580 **diversity of synonymous sites.** (a) LD decay of 21 bacterial species. The maximum comparison

581 distance was set to 30 kb. The vertical dashed line indicated the LD  $r^2$  values at pairwise distance of 3

582 kb, which were used in panel b and d. Line colours indicated the estimated  $N_e r$  values. (b).

583 Correlation between  $N_e r$  and LD  $r^2$  values. (c) Correlation between  $N_e r$  and nucleotide diversity of

584 synonymous sites  $\pi_{syn}$ . (d) Correlation between LD  $r^2$  values and nucleotide diversity of synonymous

585 sites  $\pi_{syn}$ . Point colours in panel b-d indicated the estimated  $N_e r$  values.

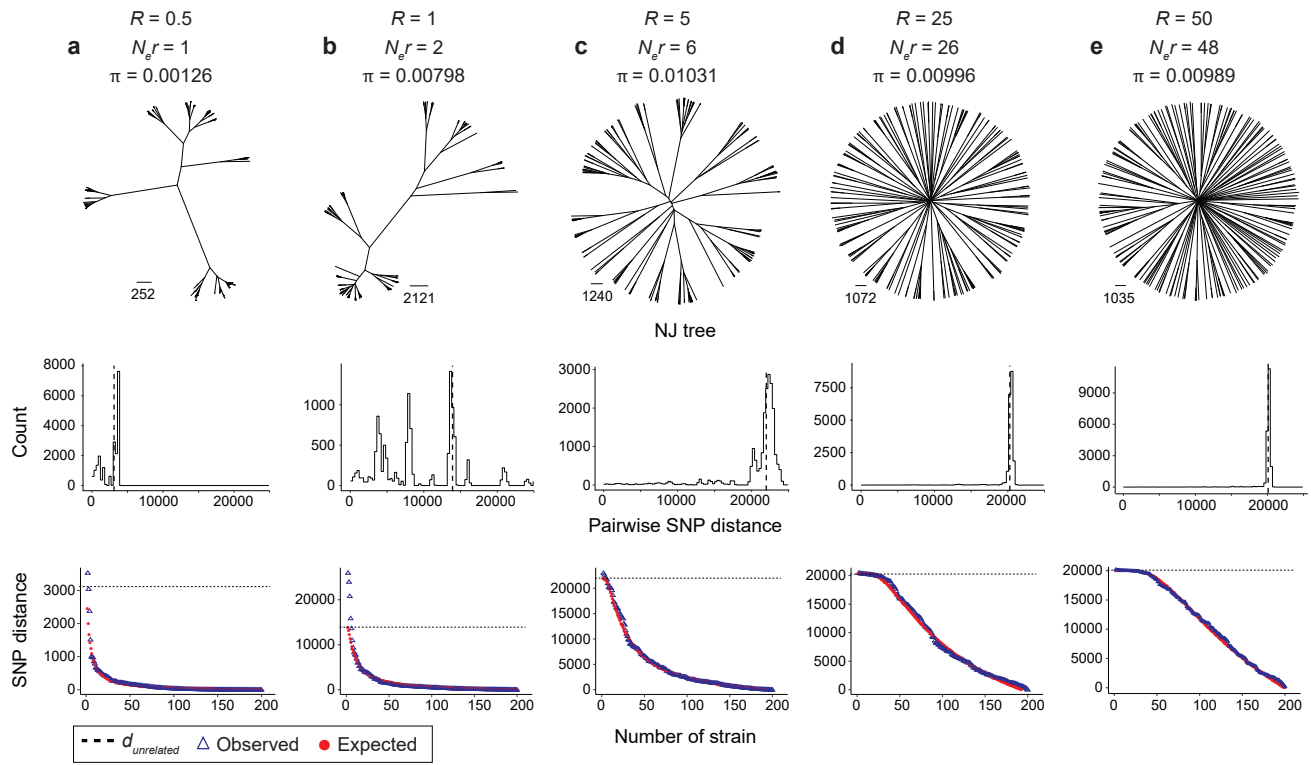



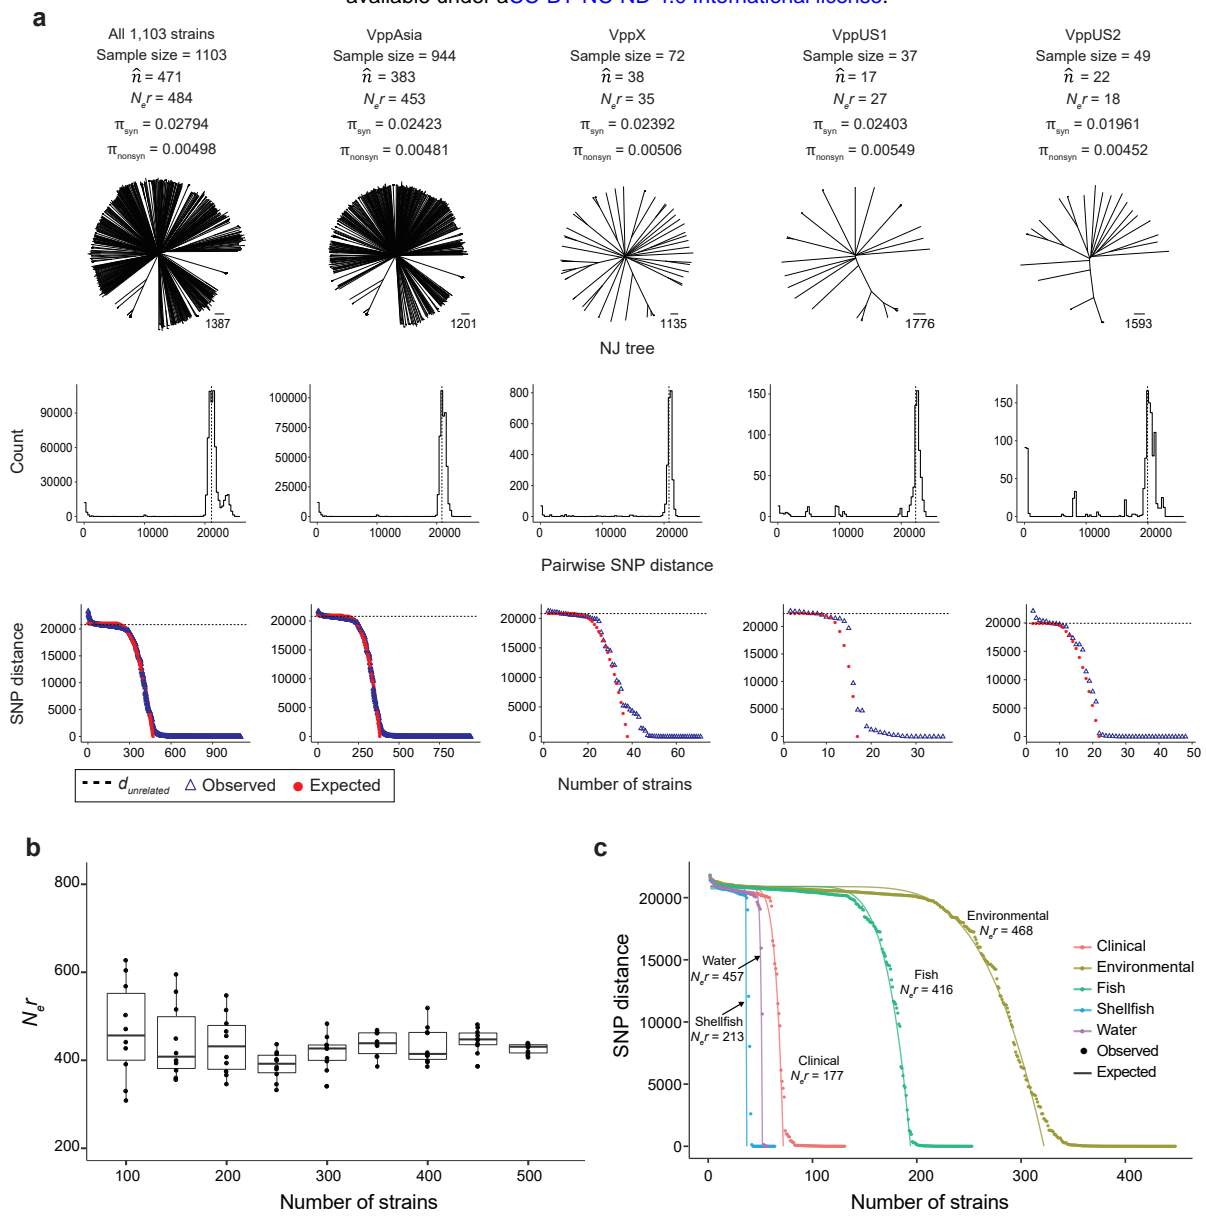

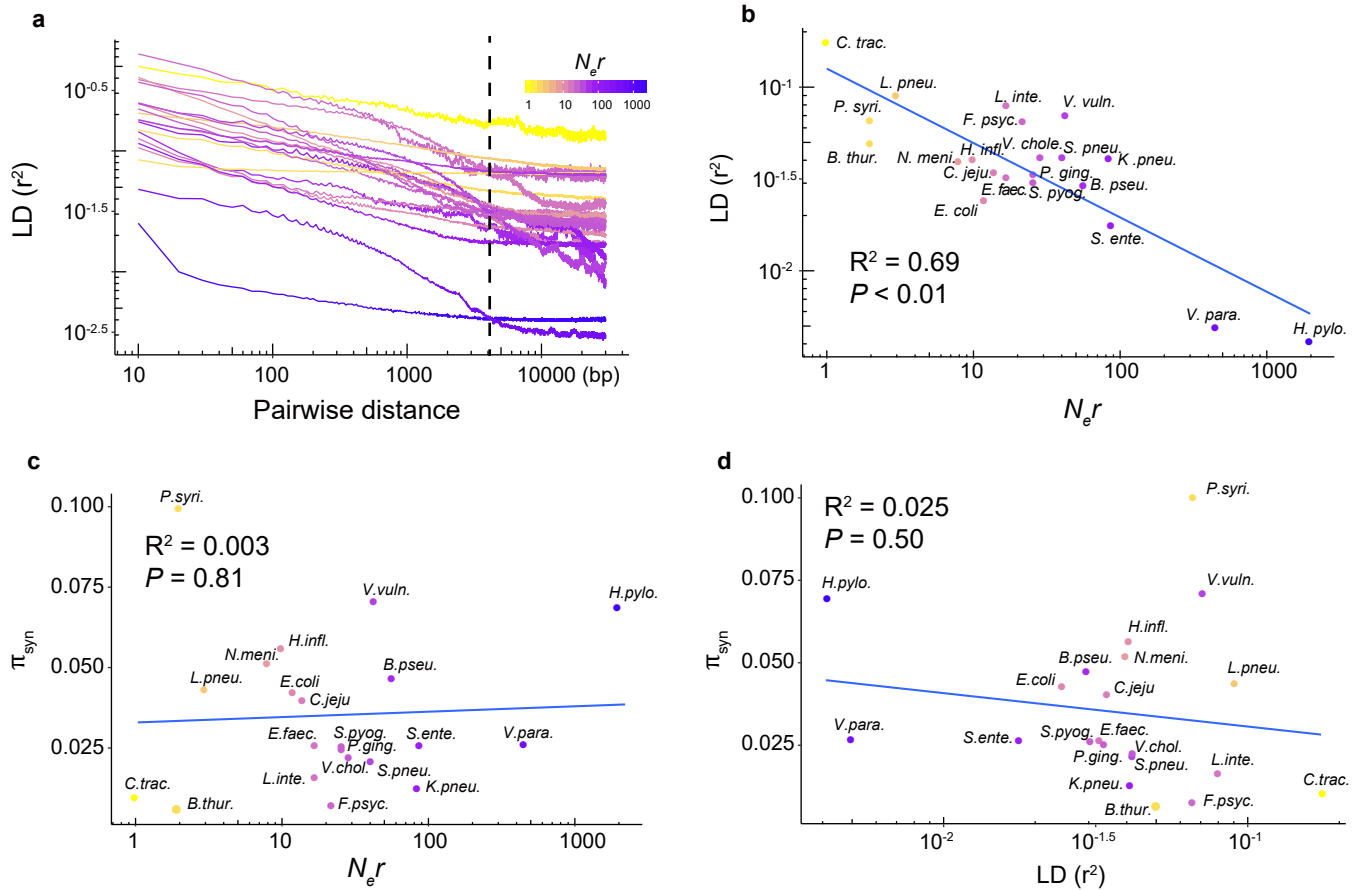

Source: https://www.biorxiv.org/content/10.1101/385336v3.full.pdf
